# Supplementary material
Source: PubMed Central journal article supplement (PMC6355145)
Supplement: NIHMS993768-supplement-1.pdf [file NIHMS993768-supplement-1.pdf]

## Supplemental Material

|                                                        |                                                                              |
|--------------------------------------------------------|------------------------------------------------------------------------------|
| 5' adapter with molecular identifier                   | AAGCAGUGGTAUCAACGCAGAGUNNNNUNNNUNNN<br>NUCTTrGrG+G                           |
| TCR <sub>beta</sub> mRNA primer                        | CAGTATCTGGAGTCATTGA                                                          |
| IGG mRNA primer                                        | GCTGGAGGGCACGGTCA                                                            |
| Forward primer with index adapter                      | TCGTCGGCAGCGTCAGATGTGTATAAGAGACAGN <sub>2</sub> -<br>4AAGCAGTGGTATCAACGCAGAG |
| IGG reverse primer with index adapter                  | GTCTCGTGGGCTCGGAGATGTGTATAAGAGACAGCCN <sub>2</sub> -<br>4CGATGGGCCCTTGGTGG   |
| TCR <sub>beta</sub> reverse primer with index adapter: | GTCTCGTGGGCTCGGAGATGTGTATAAGAGACAGCCN <sub>2</sub> -<br>4ACACSTTKTTCAGGTCCTC |

Supplemental Table 1 - **Primers Used:**  
The template switch was ordered from Exiqon, all others were ordered from IDT.
